# Supplementary material for: Glucagon Receptor Antagonism Improves Glucose Metabolism and Cardiac Function by Promoting AMP-Mediated Protein Kinase in Diabetic Mice
Source: PubMed Central journal article supplement — Cell Rep. Author manuscript; Available in PMC 2018 May 31. (PMC5978750; doi:10.1016/j.celrep.2018.01.065), 2018-02-13
Supplement: NIHMS943891-supplement-1.pdf [file NIHMS943891-supplement-1.pdf]

Cell Reports, Volume 22

## Supplemental Information

### **Glucagon Receptor Antagonism Improves Glucose Metabolism and Cardiac Function by Promoting AMP-Mediated Protein Kinase in Diabetic Mice**

**Ankit X. Sharma, Ezekiel B. Quittner-Strom, Young Lee, Joshua A. Johnson, Sarah A. Martin, Xinxin Yu, Jianping Li, John Lu, Zheqing Cai, Shihwei Chen, May-yun Wang, Yiyi Zhang, Mackenzie J. Pearson, Andie C. Dorn, Jeffrey G. McDonald, Ruth Gordillo, Hai Yan, Dung Thai, Zhao V. Wang, Roger H. Unger, and William L. Holland**

## **Inventory of Supplemental Materials**

We have included 4 supplemental figures. Supplemental figure 1 provides data on the effects of REMD 2.59 on serum glucagon and pair-feeding on hepatic steatosis and circulating adiponectin. Supplemental figure 2 details glucose levels prior to and during hyperinsulinemic-euglycemic clamps and summarizes relevant clamp parameters. Supplemental figure 3 details the effects of REMD 2.59 on sphingolipids in serum and selected tissues in Lep<sup>ob/ob</sup> mice after antibody administration – specifically, it shows levels of individual serum ceramide species, liver glucosylceramide species, and liver/soleus 1-O-acylceramide species. Supplemental figure 4 details the hyperinsulinemic euglycemic-or-hypoglycemic clamp conducted on wildtype mice to show that hypoglycemia, which is often observed in REMD 2.59 treated mice, does not increase AMPK activation. Additionally, supplemental figure 4 provides data on individual cardiac ceramide derivative species and other sphingoids in LPL<sup>GPI</sup> mice treated with REMD 2.59 or vehicle.

## Supplemental Figure 1, Related to Figure 1

**A**

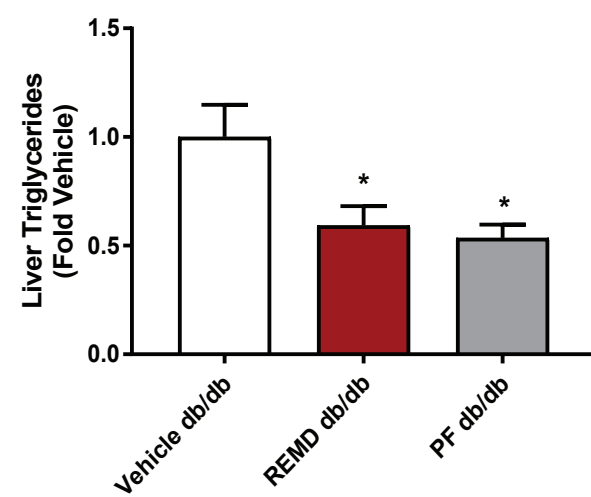

**B**

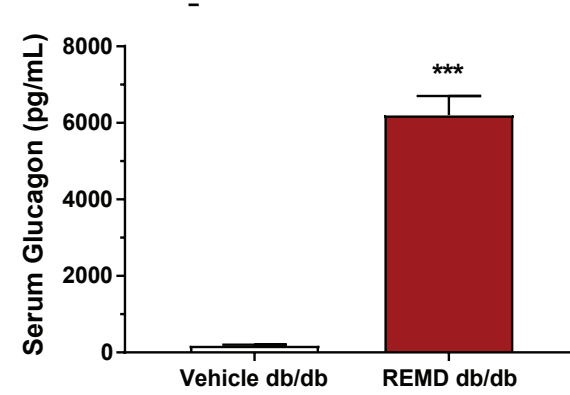

**C**

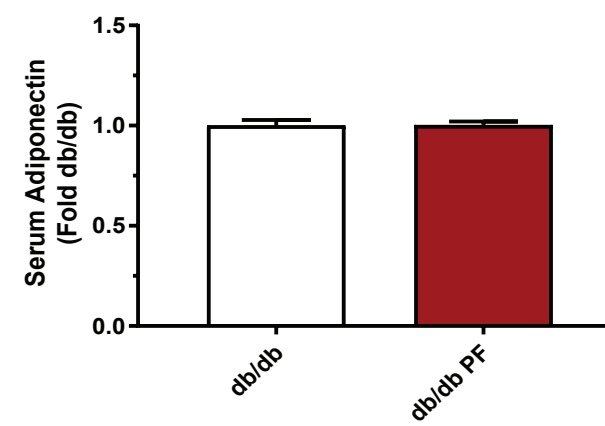

**Supplemental 1. A)** Liver triglycerides were assessed in  $Lep^{db/db}$  mice after 10 days following REMD 2.59/Vehicle treatment or pair-feeding. **B)** Serum glucagon levels were assessed via ELISA in REMD 2.59 and vehicle treated  $Lep^{db/db}$  mice on day 7 of the 10-day timecourse. **C)** Circulating adiponectin levels were measured via western blot using 0.25 $\mu$ L of serum from chow-fed and pair-fed  $Lep^{db/db}$  mice, following 10 days of feeding. \* $P < 0.05$ , \*\* $P < 0.01$ , \*\*\* $P < 0.001$  by student's  $t$  test. Data represented as mean  $\pm$  SEM.

## Supplemental Figure 2, Related to Figure 3

**A**

**Basal**

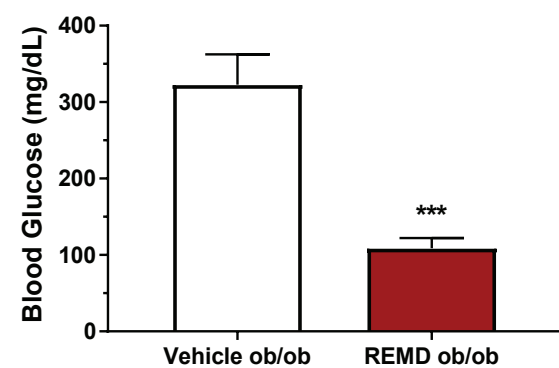

**B**

**Clamped**

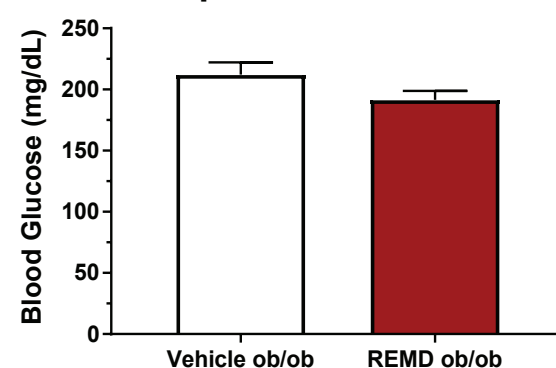

**C**

|               | Body Weight (g) | Basal                  |                        |                      |                         | Clamped                |                        |                      |                         |
|---------------|-----------------|------------------------|------------------------|----------------------|-------------------------|------------------------|------------------------|----------------------|-------------------------|
|               |                 | Plasma Glucose (mg/dL) | Plasma Insulin (ng/mL) | Plasma NEFA (mmol/L) | Plasma Glycerol (mg/mL) | Plasma Glucose (mg/dL) | Plasma Insulin (ng/mL) | Plasma NEFA (mmol/L) | Plasma Glycerol (mg/mL) |
| Vehicle ob/ob | 47.5 ± 1.3      | 322.8 ± 39.7           | 8.93 ± 3.65            | 0.84 ± 0.09          | 1.44 ± 0.12             | 212.1 ± 10.0           | 16.59 ± 1.15           | 0.82 ± 0.09          | 1.82 ± 0.10             |
| REMD ob/ob    | 49.9 ± 2.8      | 108.7 ± 13.3           | 8.69 ± 2.49            | 0.87 ± 0.17          | 1.50 ± 0.15             | 191.5 ± 7.4            | 14.74 ± 2.03           | 0.39 ± 0.05          | 1.73 ± 0.23             |

**Supplemental 2. A)** Circulating blood glucose levels were assessed following a 3-hour fast prior to hyperinsulinemic clamps. **B)** Circulating blood glucose levels were measured in the clamped state. **C)** Relevant metabolic parameters before and during hyperinsulinemic-euglycemic clamp. \* $P < 0.05$ , \*\* $P < 0.01$ , \*\*\* $P < 0.001$  by Student's  $t$  test. Data represented as mean ± SEM.

Supplemental Figure 3, Related to Figure 4

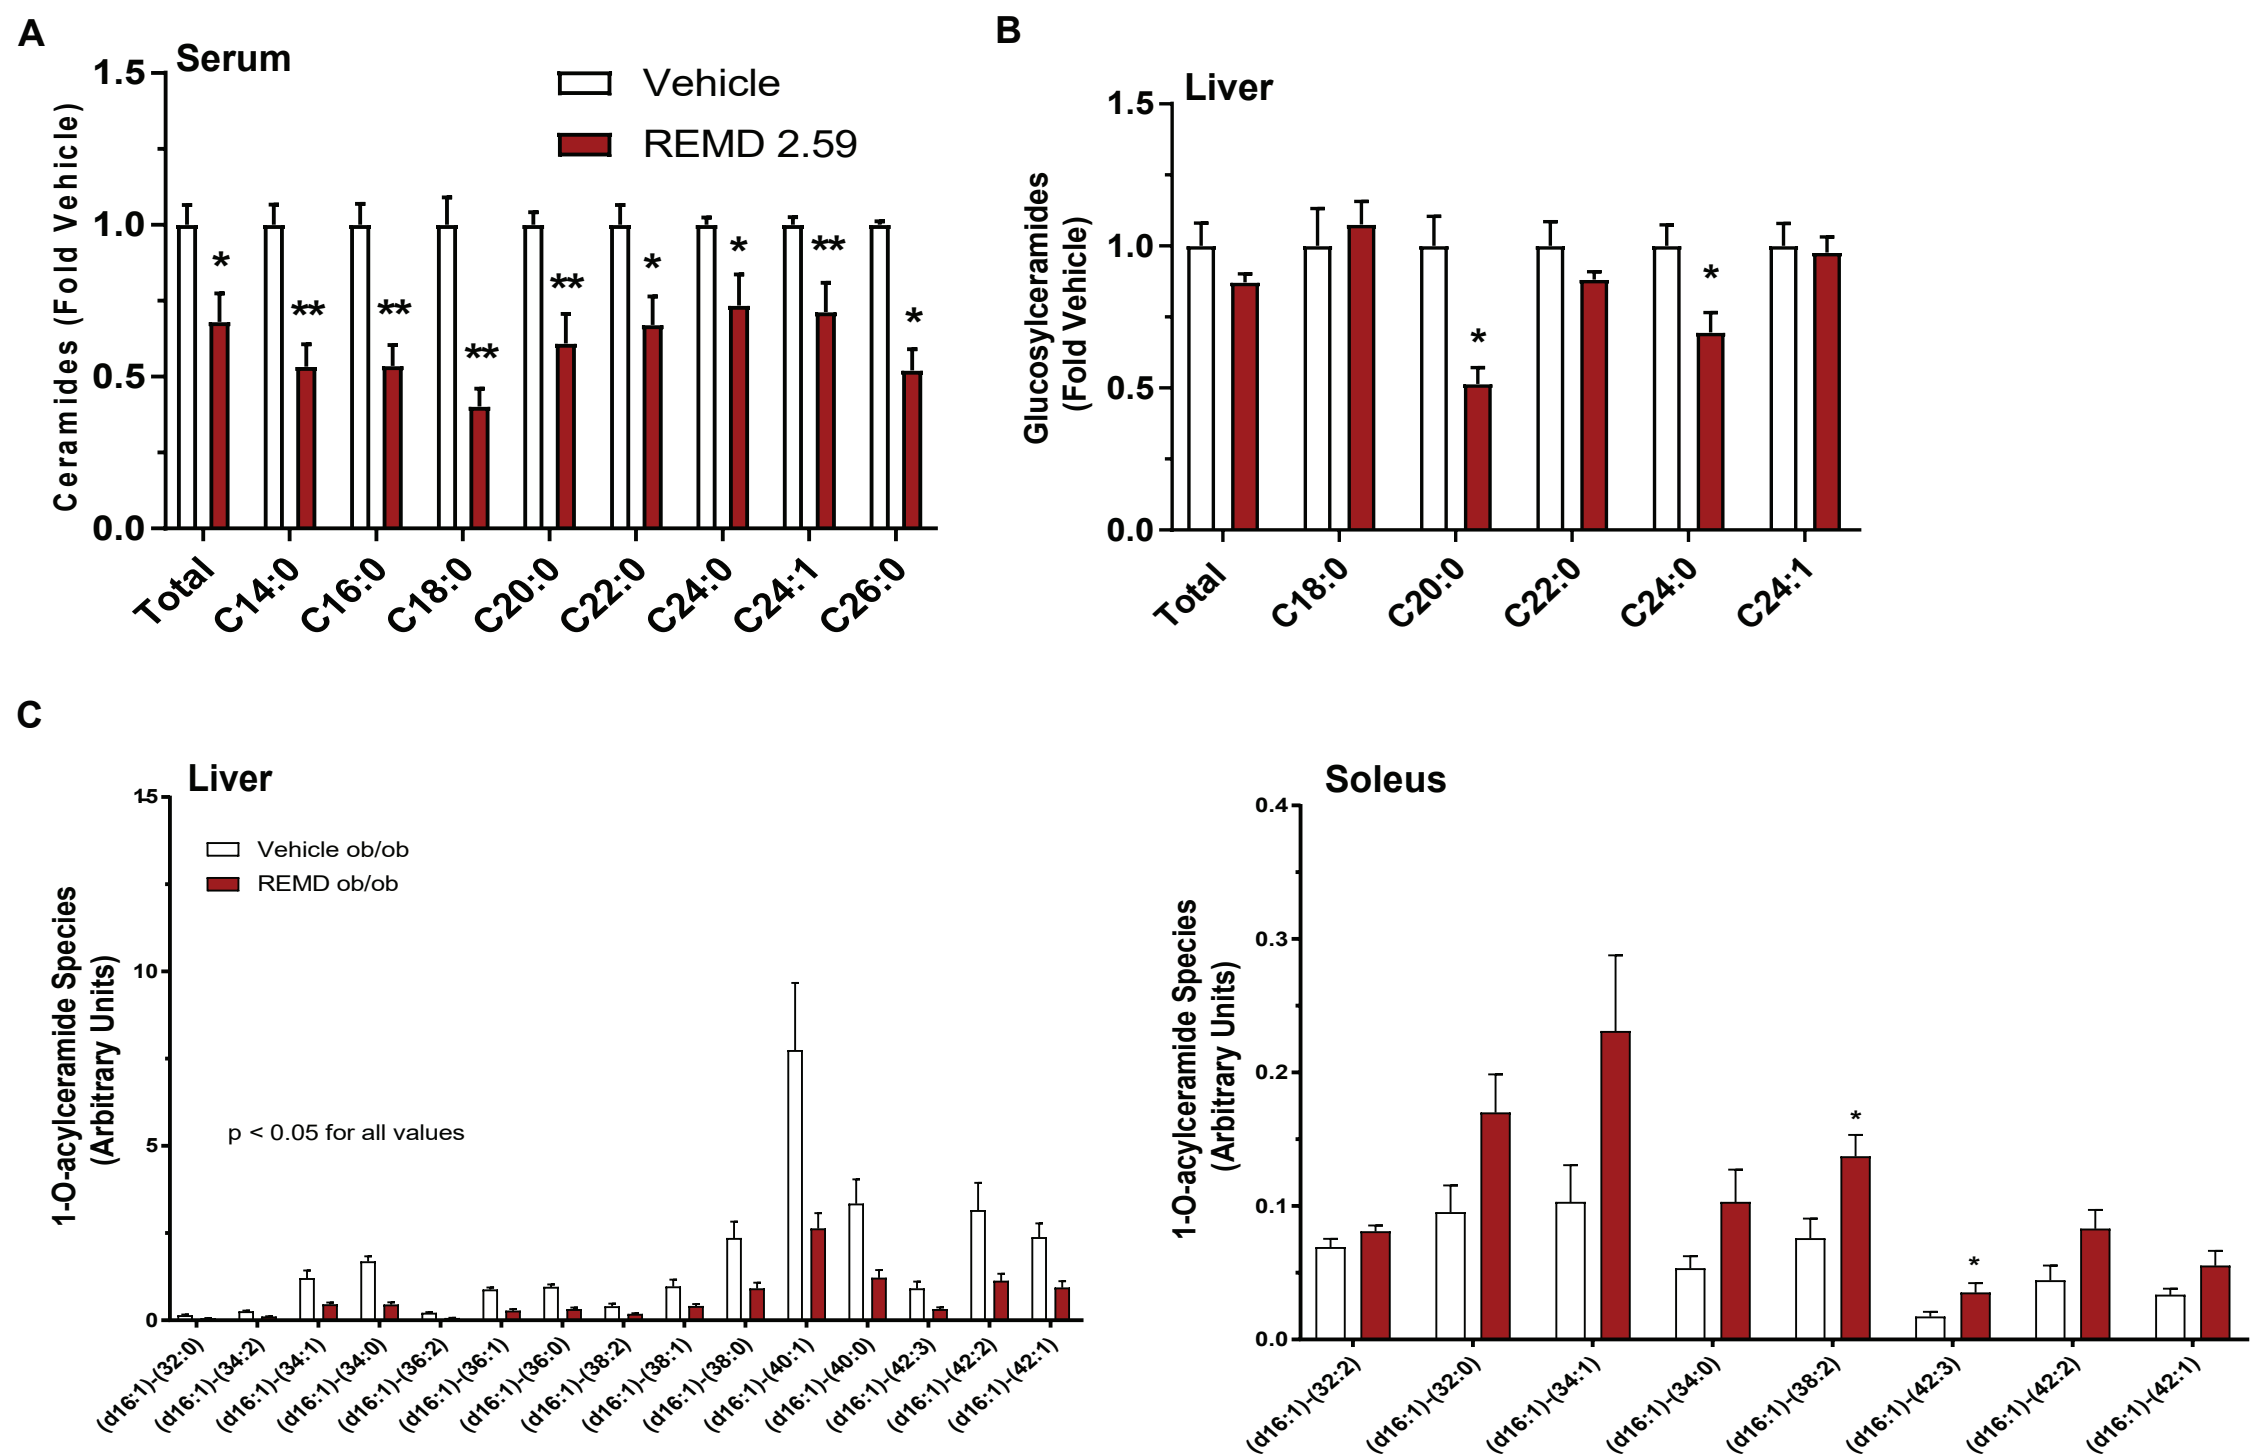

**Supplemental 3. A-B)** Ob/ob mice were treated with REMD 2.59 or vehicle (5 mg/kg subcutaneous injection) and sacrificed 5 days later and tissues were harvested. Serum ceramides and liver glucosylceramides were assayed via mass spectrometry. **C)** 1-O-acylceramide species were quantified in liver (left) and soleus (right) by LC-MS/MS.

\* $P < 0.05$ , \*\* $P < 0.01$ , \*\*\* $P < 0.001$  by Student's  $t$  test. Data represented as mean  $\pm$  SEM.

# Supplemental Figure 4, Related to Figure 6

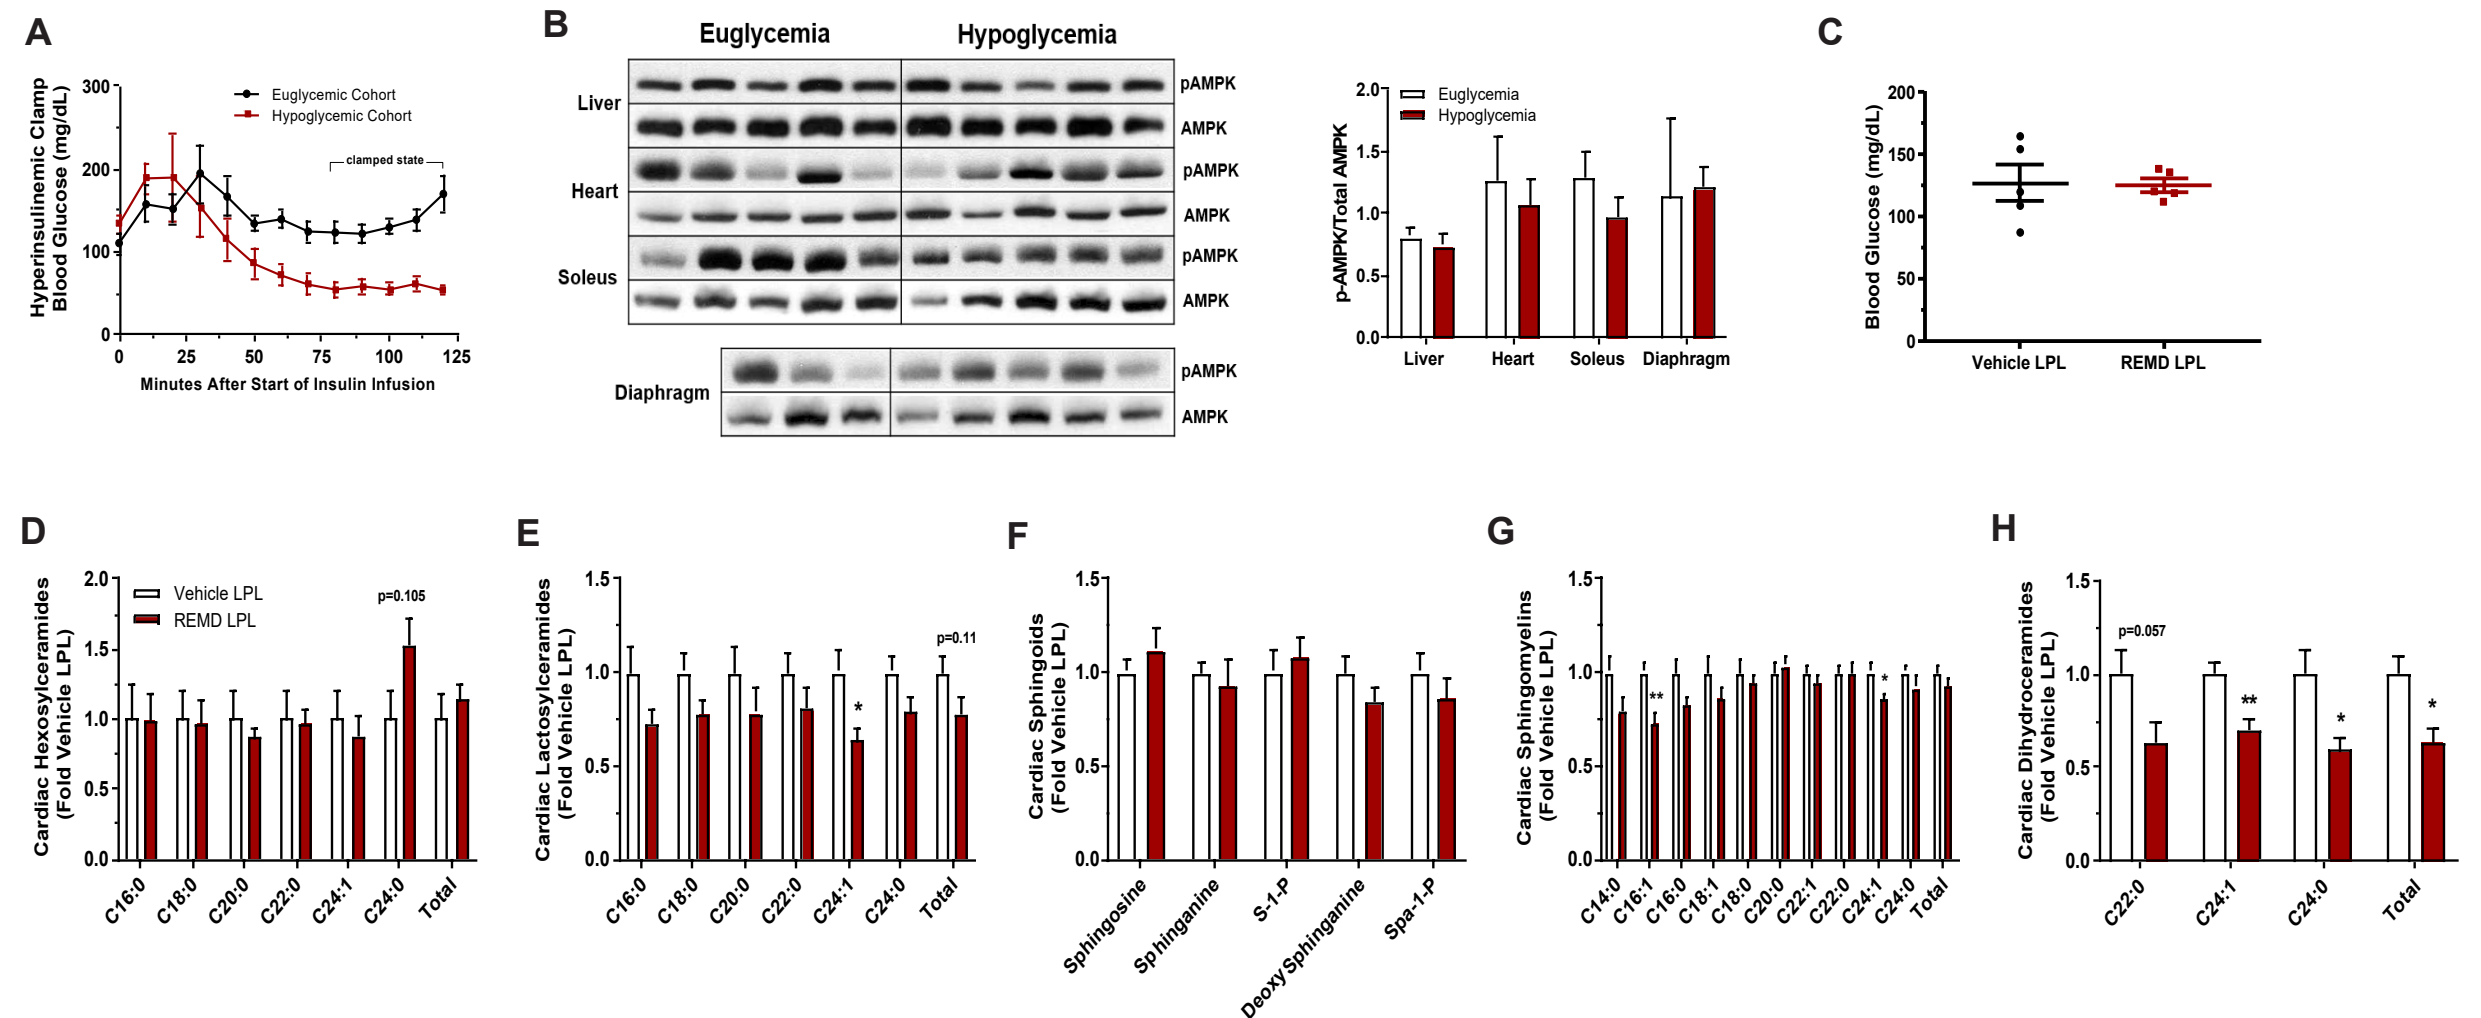

**Supplemental 4. A-B)** Hyperinsulinemic clamp studies were conducted on age-matched wildtype mice. Mice (n=5 per cohort) were clamped at either euglycemia (~130 mg/dL) or hypoglycemia (~70 mg/dL) for an hour, at which point mice were sacrificed and tissues were collected for protein analysis. **A)** Average blood glucose over the course of the clamp shows that mice were adequately maintained at either euglycemia or hypoglycemia. **B)** Representative immunoblot for activated AMPK and total AMPK in liver, heart, soleus, and diaphragm (left) and the ratio of activated AMPK to total AMPK was quantified via densitometry (right). **C)** Fed glucose was measured in LPL<sup>GPI</sup> mice at 15 weeks of age. **D-H)** Cardiac hexosylceramides, lactosylceramides, dihydroceramides, sphingomyelins, and sphingoids were quantified via mass spectrometry. \**P*<0.05, \*\**P*<0.01, \*\*\**P*<0.001 by Student's *t* test. Data represented as mean ± SEM.
